# Supplementary material for: Phylogenetic Relationships and Potential Functional Attributes of the Genus Parapedobacter: A Member of Family Sphingobacteriaceae
Source: Front Microbiol. 2020 Sep 4;11:1725. doi: 10.3389/fmicb.2020.01725 (PMC7500135; doi:10.3389/fmicb.2020.01725)
Supplement: Supplementary file 3 [file Data_Sheet_2.xlsx]

## Sheet: Pectinesterase
Pectinesterase
Hit	Accession No.	Length	Query Coverage (%)	Identity (%)
I							Sphingobacteriaceae
Parapedobacter luteus DSM22899	SKB58403.1	340	100	100			Others
Parapedobacter luteus DSM22899	WP_079716886.1	322	94	100
Parapedobacter composti DSM22900	WP_090973396.1	326	96	66.88
Pontibacter diazotrophicus	WP_115565329.1	328	100	62.42
Pontibacter ummariensis	WP_089319848.1	329	99	62.54
Pontibacter korlensis	WP_046311053.1	328	92	66.56
Pontibacter akesuensis	WP_068837139.1	329	92	66.22
Pontibacter indicus	WP_076671686.1	330	91	66.1
Rufibacter roseus	WP_066624157.1	326	96	63.46
Nafulsella turpanensis	WP_017730482.1	344	99	61.66
Pontibacter roseus	WP_018479492.1	331	95	63.26
II
Parapedobacter luteus DSM22899	WP_079716886.1	322	100	100
Parapedobacter luteus DSM22899	SKB58403.1	340	94	100
Parapedobacter composti DSM22900	WP_090973396.1	326	91	66.88
Pontibacter ummariensis	WP_089319848.1	329	93	62.54
Pontibacter diazotrophicus	WP_115565329.1	328	94	62.42
Pontibacter korlensis	WP_046311053.1	328	87	66.56
Pontibacter akesuensis	WP_068837139.1	329	87	66.22
Nafulsella turpanensis	WP_017730482.1	344	96	61.66
Pontibacter indicus	WP_076671686.1	330	86	66.1
Rufibacter roseus	WP_066624157.1	326	91	63.46
Pontibacter roseus	WP_018479492.1	331	90	63.26
I
Parapedobacter composti DSM22900	WP_090973396.1	326	100	100
Parapedobacter luteus DSM22899	WP_079716886.1	322	91	66.88
Parapedobacter luteus DSM22899	SKB58403.1	340	96	66.88
Rufibacter sp. DG31D	WP_048919910.1	329	98	58.07
Pedobacter glucosidilyticus	WP_026905043.1	320	97	56.15
Rufibacter roseus	WP_066624157.1	326	92	61.06
Algoriphagus resistens	WP_057937401.1	324	96	58.99
Pontibacter akesuensis	WP_068837139.1	329	90	61.82
Pontibacter ummariensis	WP_089319848.1	329	97	58.36
Rufibacter immobilis	WP_123134749.1	329	92	61.13
Pontibacter indicus	WP_076671686.1	330	89	62.46

## Sheet: Pectate lyase
Pectate lyase
Hit	Accession No.	Length	Query Coverage (%)	Identity (%)
I
Parapedobacter composti DSM22900	WP_090973397.1	353	100	100
Parapedobacter luteus	SKB58451.1	351	98	73.5			Sphingobacteriaceae
Sphingobacterium sp. 21	WP_013666151.1	344	94	55.9			Others
Olivibacter jilunii	WP_130857568.1	344	94	55.9
Pseudosphingobacterium domesticum	WP_093324740.1	343	93	53.75
Pedobacter sp. HMWF019	WP_108553969.1	341	96	47.67
Pedobacter africanus	WP_084241580.1	343	94	47.79
Xanthomonas melonis	WP_104588671.1	342	89	52.17
Pedobacter nyackensis	WP_084292388.1	351	96	46.7
Stenotrophomonas	WP_062170803.1	358	97	48.01
uncultured bacterium	AAW84082.1	366	91	50.15
II
Parapedobacter composti DSM22900	SFC28130.1	497	100	100
Catalinimonas alkaloidigena	WP_089683571.1	491	96	67.22
Ohtaekwangia koreensis	WP_079689922.1	498	92	70.72
Pedobacter glucosidilyticus	WP_026905039.1	490	98	64.9
Pontibacter diazotrophicus	WP_115565334.1	497	92	67.54
Mariniflexile sp. TRM1-10	WP_117173062.1	521	96	64.03
Zunongwangia mangrovi	WP_092543984.1	479	96	63.07
Zunongwangia mangrovi	SFC72907.1	478	96	63.05
Zunongwangia atlantica 22II14-10F7	ORL47368.1	477	96	62.92
[Zunongwangia atlantica	WP_084839865.1	478	92	65.29
Pontibacter roseus	WP_018479499.1	496	97	65.11
III
Parapedobacter composti DSM22900	WP_090972891.1	1041	100	100
Rufibacter tibetensis	WP_062546087.1	1056	98	56.49
Pedobacter tournemirensis	WP_128768638.1	1045	95	56.43
Pedobacter sp. FJ4-8	WP_109418295.1	1036	94	56.67
Pedobacter sp.	RZM28163.1	1044	96	54.62
Hymenobacteraceae bacterium SYSU D60016	WP_114782518.1	1028	95	57.82
Pedobacter glucosidilyticus	WP_039453536.1	1050	97	53.55
Runella sp. SP2	WP_122932706.1	1027	95	56.31
Chitinophaga rupis	WP_089920580.1	1039	96	55.22
Dysgonomonas macrotermitis	WP_062176797.1	1045	96	54.43
Chitinophaga sp. CF118	SFE17029.1	1008	95	57.01
I
Parapedobacter luteus DSM22899	SKB58451.1	351	100	100
Parapedobacter composti	WP_090973397.1	353	95	76.56
Sphingobacterium sp. 21	WP_013666151.1	344	98	53.75
Olivibacter jilunii	WP_130857568.1	344	98	53.75
Pseudosphingobacterium domesticum	WP_093324740.1	343	97	53.5
Xanthomonas melonis	WP_104588671.1	342	94	52.01
uncultured bacterium	AAW84082.1	366	95	48.93
Xanthomonas arboricola	KPN07592.1	330	93	51.11
Xanthomonas arboricola	WP_126966806.1	342	92	51.28
Xanthomonas arboricola	WP_104569340.1	342	92	50.96
Xanthomonas arboricola	AKC81475.1	330	93	50.79
